# Supplementary material
Source: publisher figshare collection journal article supplement (https://sage.figshare.com/ndownloader/files/15192968)
Supplement: Supplementary file 1 [file 15192968]

## Supplemental material

**Figure S1.** Sum scores from different items of the patient acceptance questionnaire

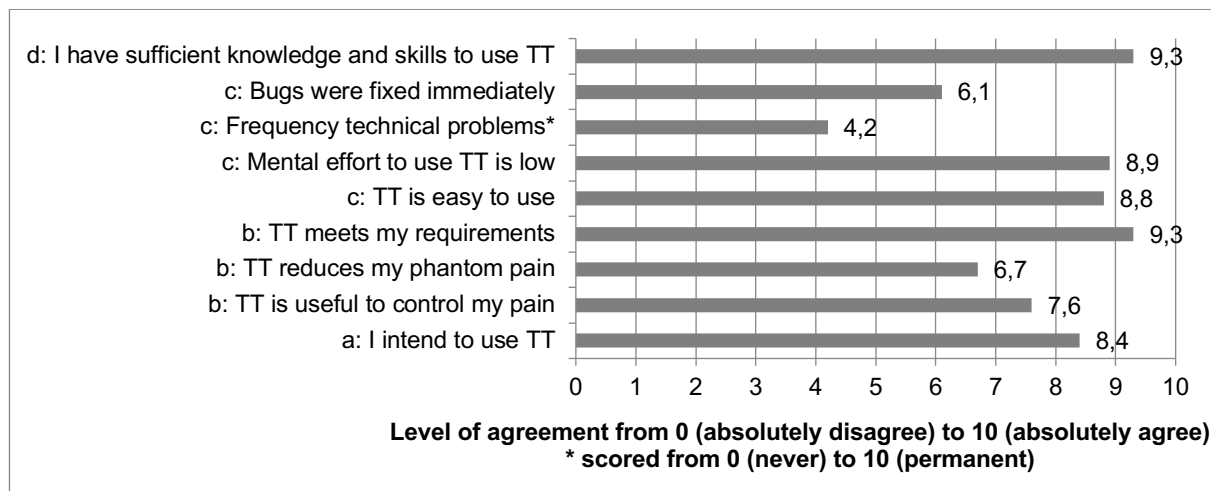

Items of acceptance questionnaire referring to different aspects of the Technology Acceptance Model (TAM):  
a: Behavioral intention to use; b: Perceived usefulness; c: Perceived ease of use; d: Perceived behavioural control;  
TT: Teletreatment.

**Figure S2.** Sum scores from different items of the therapist acceptance questionnaire

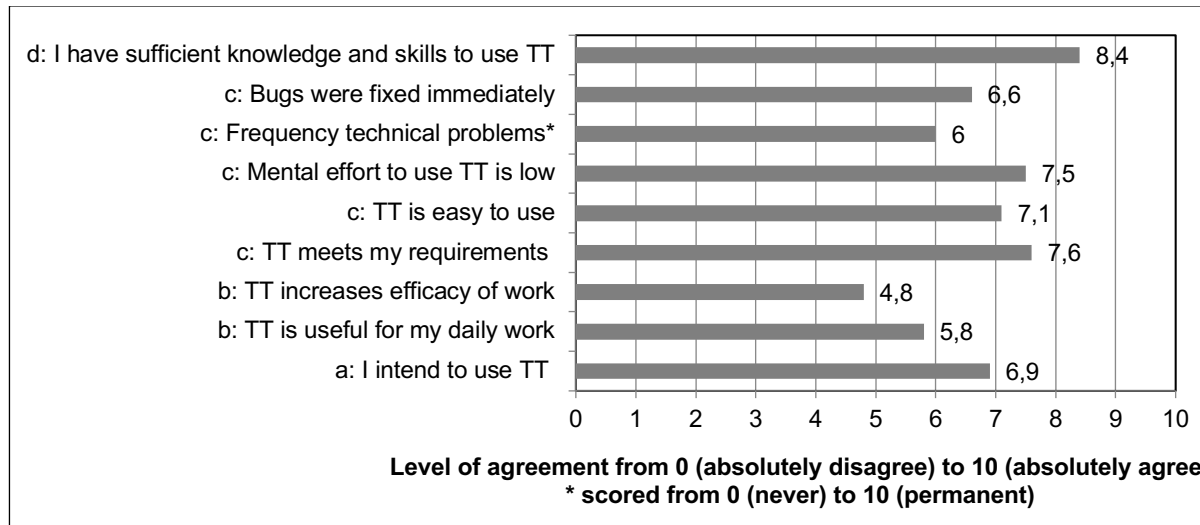

Items of acceptance questionnaire referring to different aspects of the Technology Acceptance Model (TAM):  
a: Behavioral intention to use; b: Perceived usefulness; c: Perceived ease of use; d: Perceived behavioural control;  
TT: Teletreatment.

## Patient acceptance questionnaire telerehabilitation

Below you will find two questions regarding your personal background and several statements regarding the use of the telerehabilitation. Please provide a score for each statement in how far you agree or disagree with the statement given.

### A. Your personal background

1) What is your age?

I am \_\_\_\_\_ years old.

2) Your sex

female

male

3) I am very skilled in using computers

[0] [1] [2] [3] [4] [5] [6] [7] [8] [9] [10]  
absolutely absolutely  
agree disagree

### B. Intention to use the telerehabilitation

4) Assuming that I have access to the telerehabilitation, I intend to use it.

[0] [1] [2] [3] [4] [5] [6] [7] [8] [9] [10]  
absolutely absolutely  
agree disagree

### C. Perceived usefulness of the telerehabilitation

5) The telerehabilitation is useful to control my pain.

[0] [1] [2] [3] [4] [5] [6] [7] [8] [9] [10]  
absolutely absolutely  
agree disagree

6) The use of the telerehabilitation reduces my phantom limb pain.

[0] [1] [2] [3] [4] [5] [6] [7] [8] [9] [10]  
absolutely absolutely  
agree disagree

7) The content and functionalities of the telerehabilitation meet my requirements.

[0] [1] [2] [3] [4] [5] [6] [7] [8] [9] [10]  
 absolutely agree absolutely disagree

**D. Perceived ease of use**

8) I think the telerehabilitation is easy to use.

[0] [1] [2] [3] [4] [5] [6] [7] [8] [9] [10]  
 absolutely agree absolutely disagree

9) The mental effort to use the telerehabilitation is low.

[0] [1] [2] [3] [4] [5] [6] [7] [8] [9] [10]  
 absolutely agree absolutely disagree

10) How often did technical problems during the use of the telerehabilitation occur?

[0] [1] [2] [3] [4] [5] [6] [7] [8] [9] [10]  
 never constant

11) The technical problems were fixed immediately.

[0] [1] [2] [3] [4] [5] [6] [7] [8] [9] [10]  
 absolutely agree absolutely disagree

**E. Perceived use-oriented self-efficacy**

12) I think that I have sufficient knowledge and skills to use the telerehabilitation.

[0] [1] [2] [3] [4] [5] [6] [7] [8] [9] [10]  
 absolutely agree absolutely disagree

**F. Additional comments regarding the use of the telerehabilitation**

What were positive aspects of using the telerehabilitation?

---



---



---

What were negative aspects of using the telerehabilitation?

---



---



---

## Therapist acceptance questionnaire telerehabilitation

Below you will find two questions regarding your personal background and several statements regarding the use of the telerehabilitation. Please provide a score for each statement in how far you agree or disagree with the statement given.

### A. Personal background

1) What is your age?

I am \_\_\_\_\_ years old.

2) What is your profession?

Occupational therapist

Physical therapist

3) How many patients have you treated using the telerehabilitation so far?

Number of patients: \_\_\_\_\_

4) I am very skilled in using computers

[0] [1] [2] [3] [4] [5] [6] [7] [8] [9] [10]  
absolutely agree absolutely disagree

### B. Intention to use the telerehabilitation

5) Assuming that I have access to the telerehabilitation, I intend to use it for patient care.

[0] [1] [2] [3] [4] [5] [6] [7] [8] [9] [10]  
absolutely agree absolutely disagree

### C. Perceived usefulness of the telerehabilitation

6) I think the telerehabilitation is useful for the care of my patients.

[0] [1] [2] [3] [4] [5] [6] [7] [8] [9] [10]  
absolutely agree absolutely disagree

7) The use of the telerehabilitation enhances the effectiveness of my treatment.

[0] [1] [2] [3] [4] [5] [6] [7] [8] [9] [10]  
absolutely agree absolutely disagree

8) The content and functionalities of the telerehabilitation meet my requirements.

[0] [1] [2] [3] [4] [5] [6] [7] [8] [9] [10]  
 absolutely agree absolutely disagree

**D. Perceived ease of use**

9) I think the telerehabilitation is easy to use.

[0] [1] [2] [3] [4] [5] [6] [7] [8] [9] [10]  
 absolutely agree absolutely disagree

10) The mental effort to use the telerehabilitation is low.

[0] [1] [2] [3] [4] [5] [6] [7] [8] [9] [10]  
 absolutely agree absolutely disagree

11) How often did technical problems during the use of the telerehabilitation occur?

[0] [1] [2] [3] [4] [5] [6] [7] [8] [9] [10]  
 never constant

12) The technical problems were fixed immediately.

[0] [1] [2] [3] [4] [5] [6] [7] [8] [9] [10]  
 absolutely agree absolutely disagree

**E. Perceived use-oriented self-efficacy**

13) I think that I have sufficient knowledge and skills to use the telerehabilitation.

[0] [1] [2] [3] [4] [5] [6] [7] [8] [9] [10]  
 absolutely agree absolutely disagree

**F. Additional comments regarding the use of the telerehabilitation**

What were positive aspects of using the telerehabilitation?

---



---

What were negative aspects of using the telerehabilitation?

---



---



---
